# Supplementary figures and images for: A tectonic carpet of Variscan flysch at the base of an unrooted accretion prism in NW Iberia: U-Pb zircon age constrains from sediments and volcanic olistoliths
Source: Copernicus journal article supplement (doi:10.5194/se-2020-173), 2020-10-15

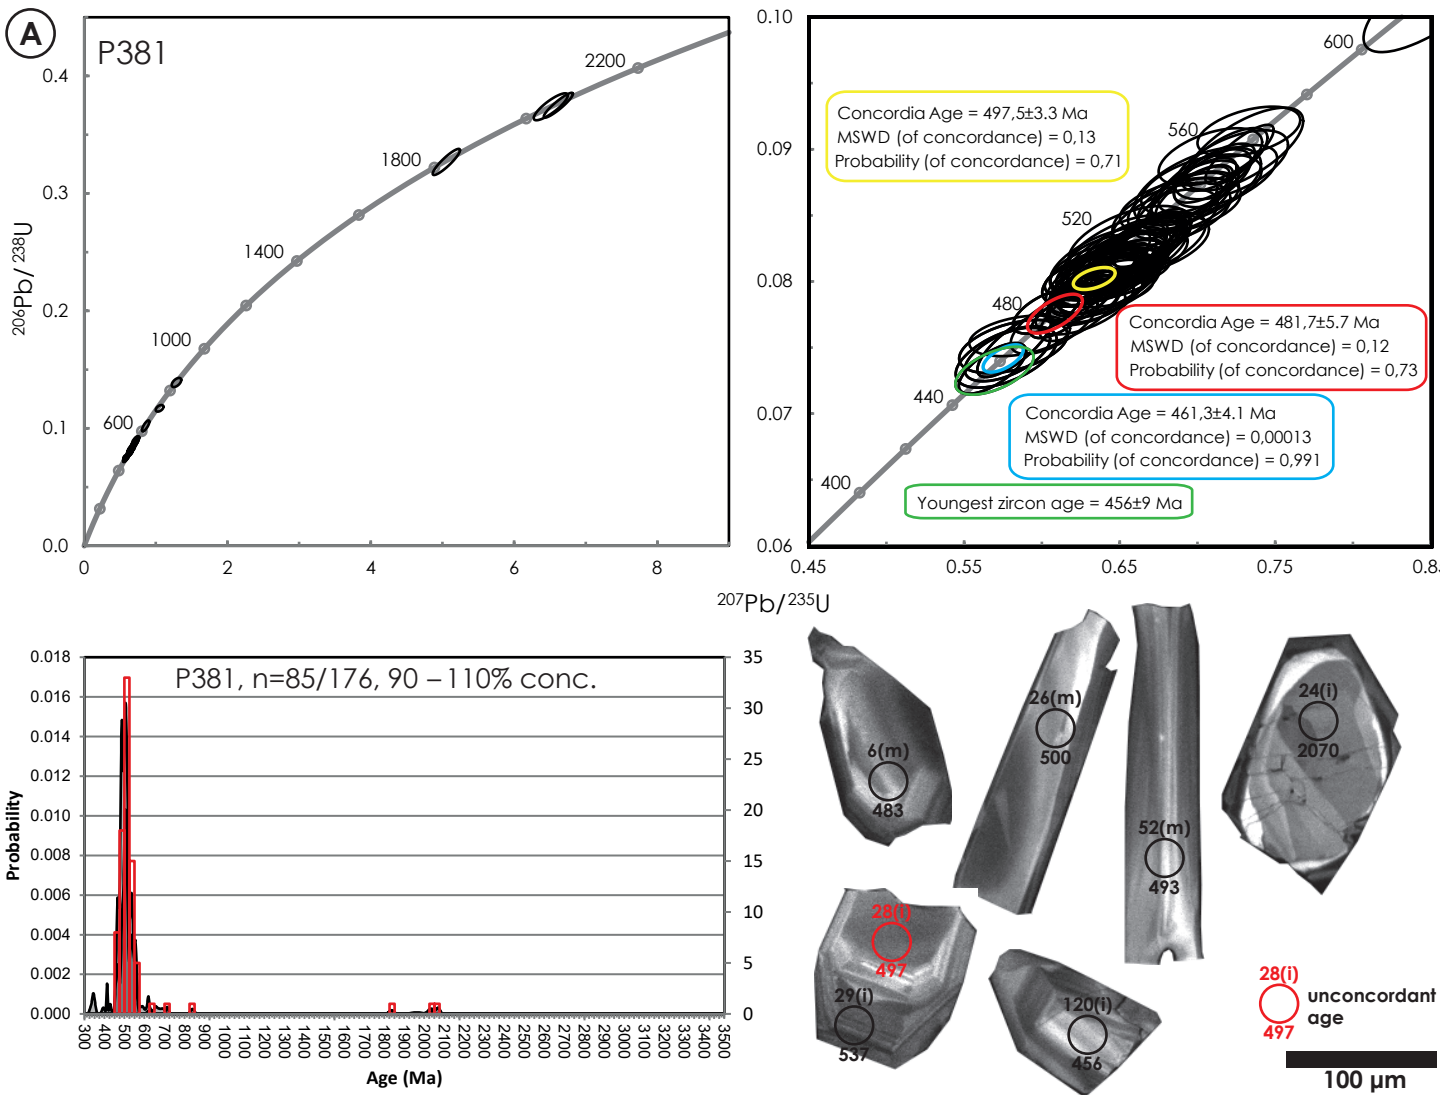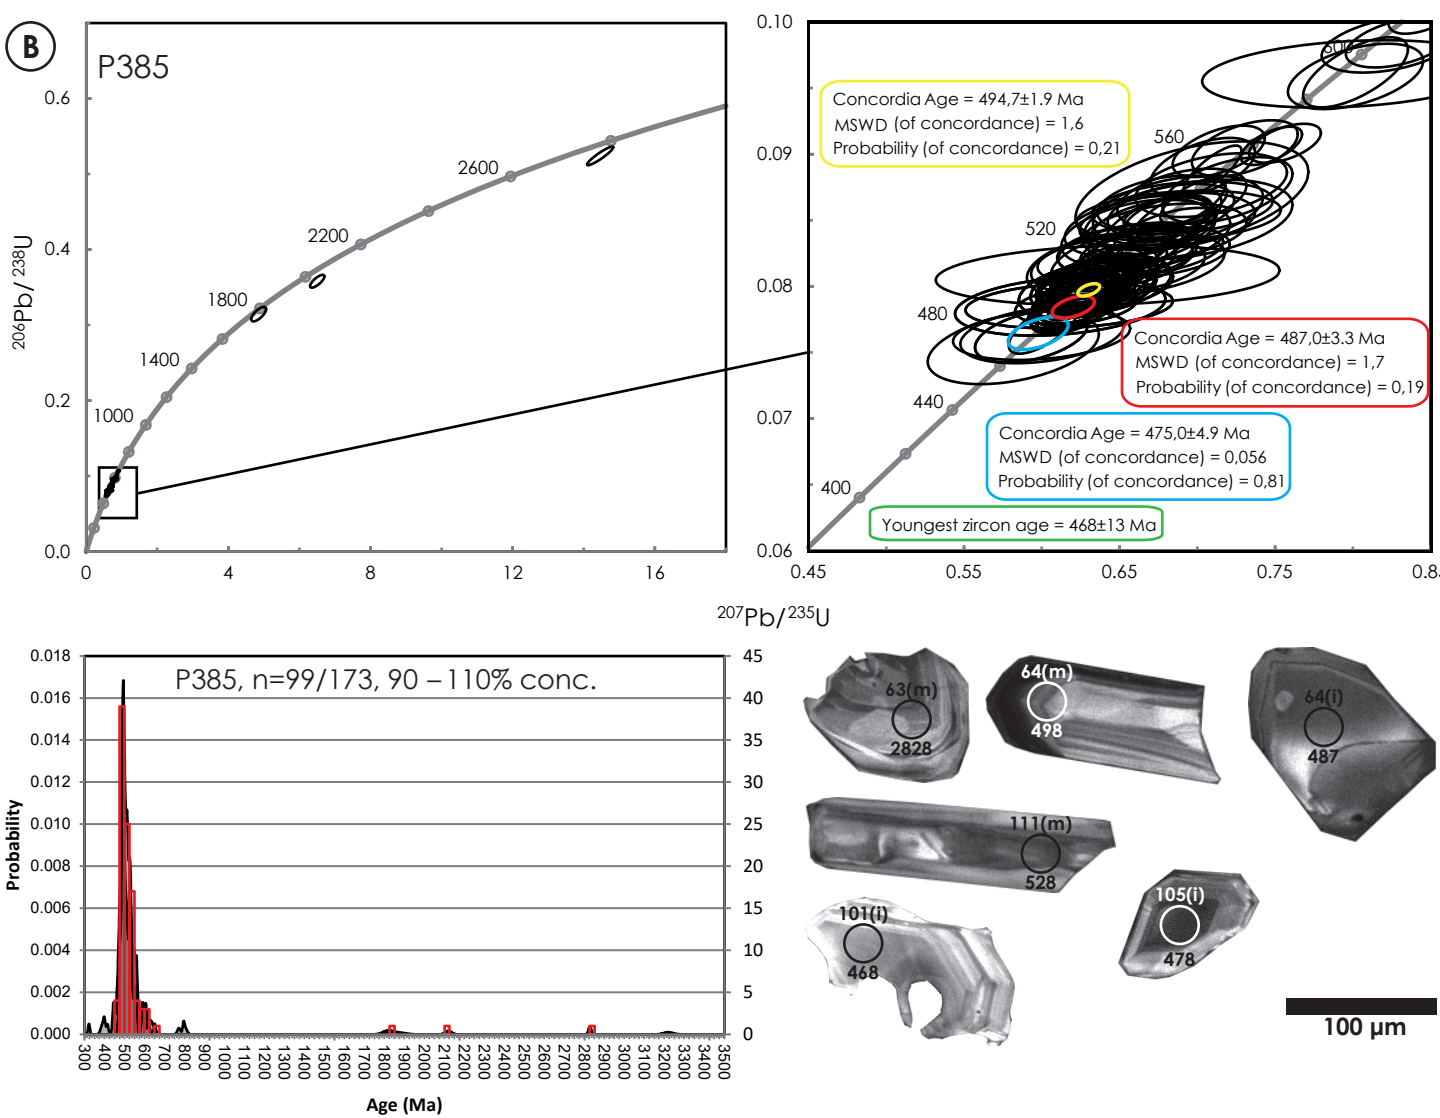

Supplement: Supplementary file 1 [file se-2020-173-supplement.zip]

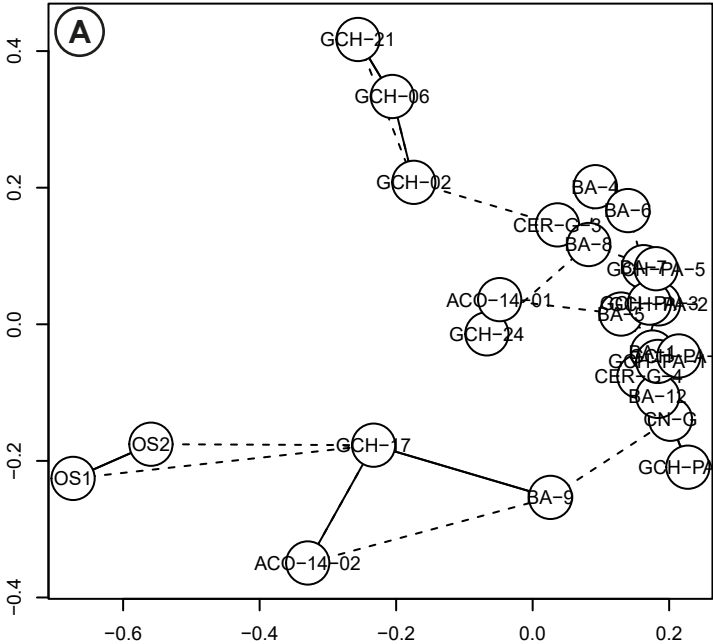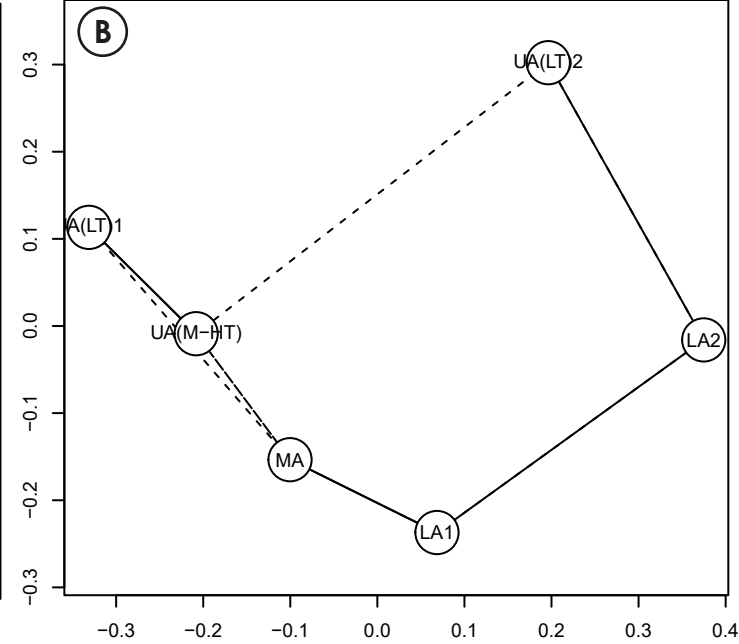

Supplement: Supplementary file 2 [file se-2020-173-supplement.zip]

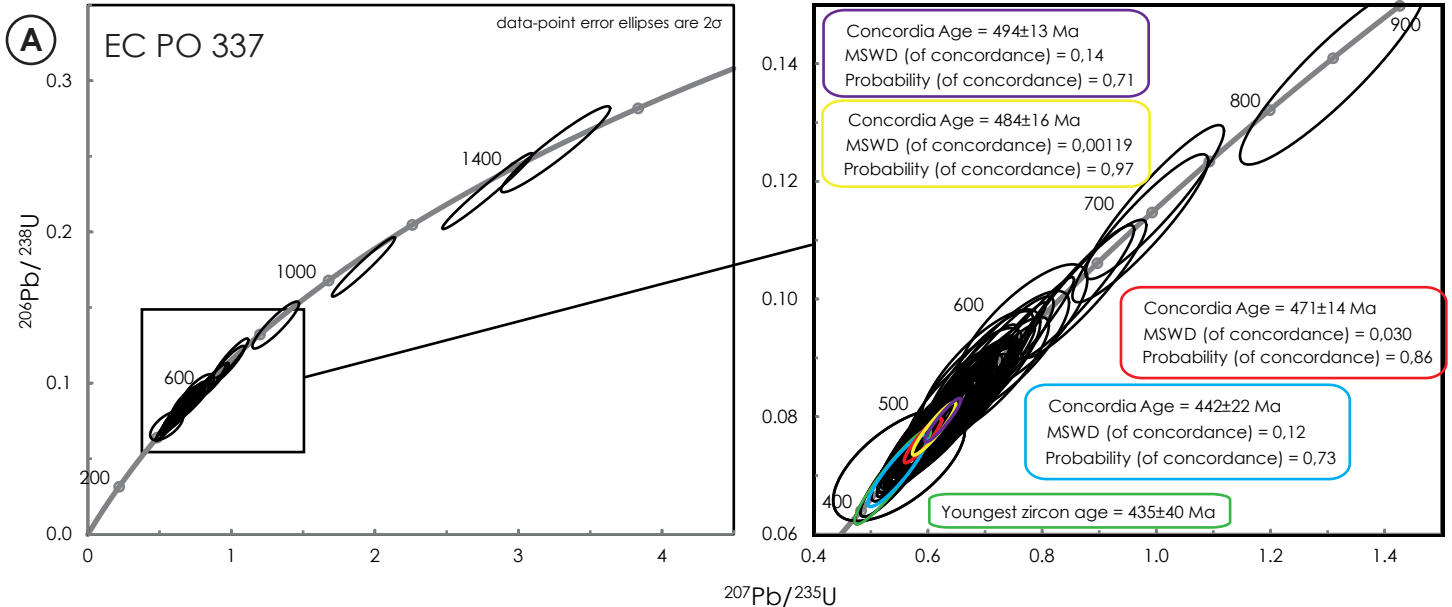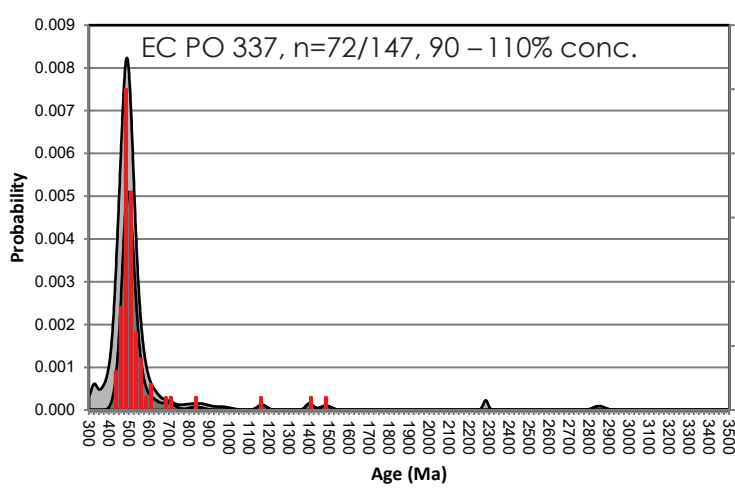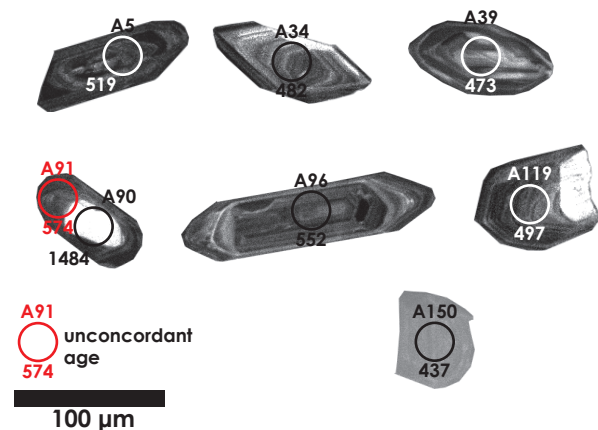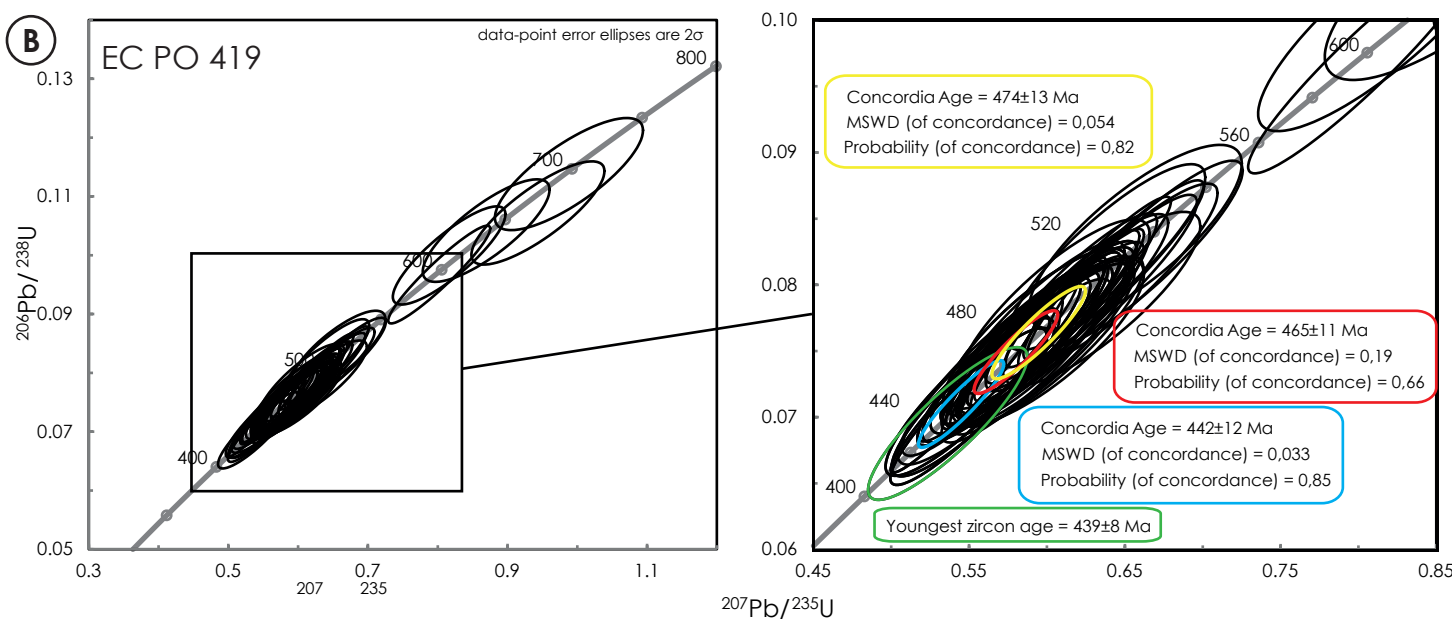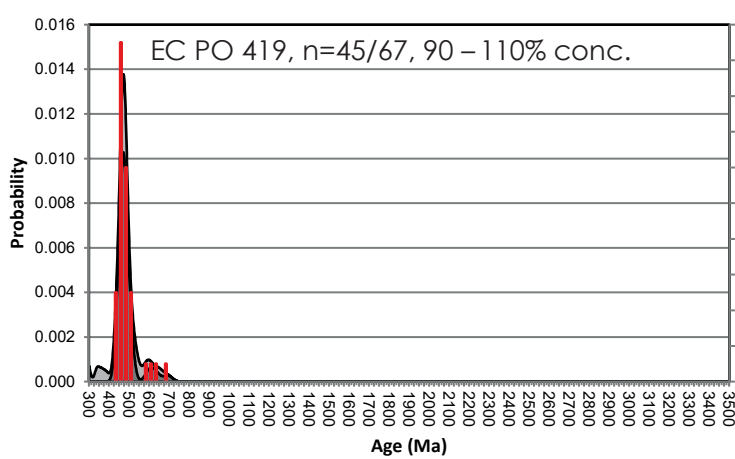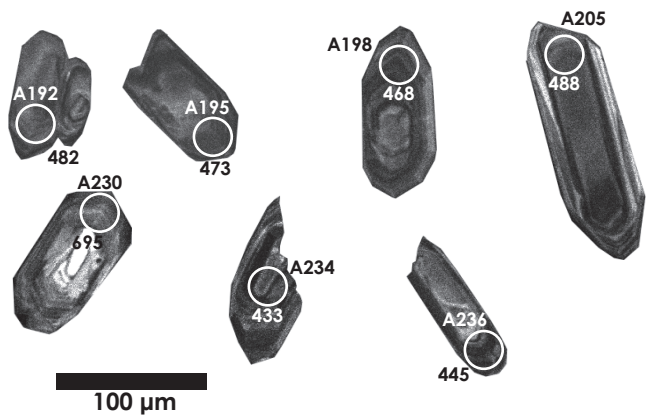

Supplement: Supplementary file 3 [file se-2020-173-supplement.zip]

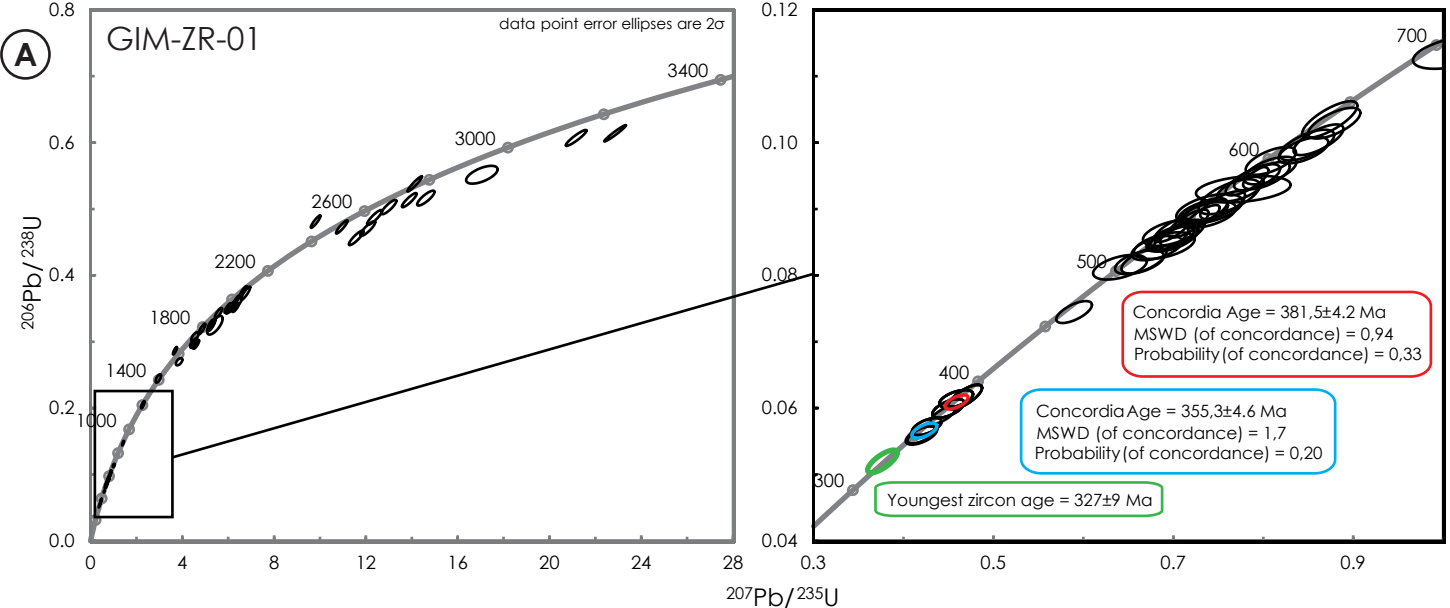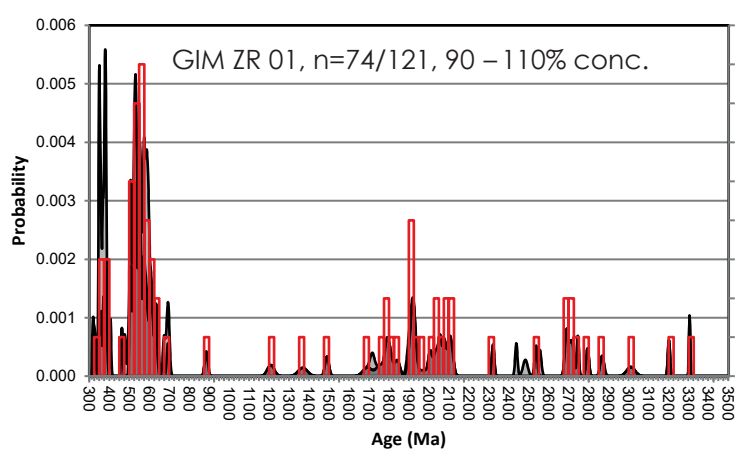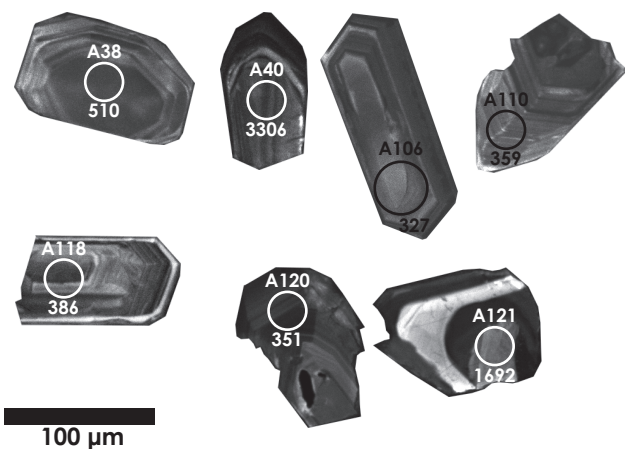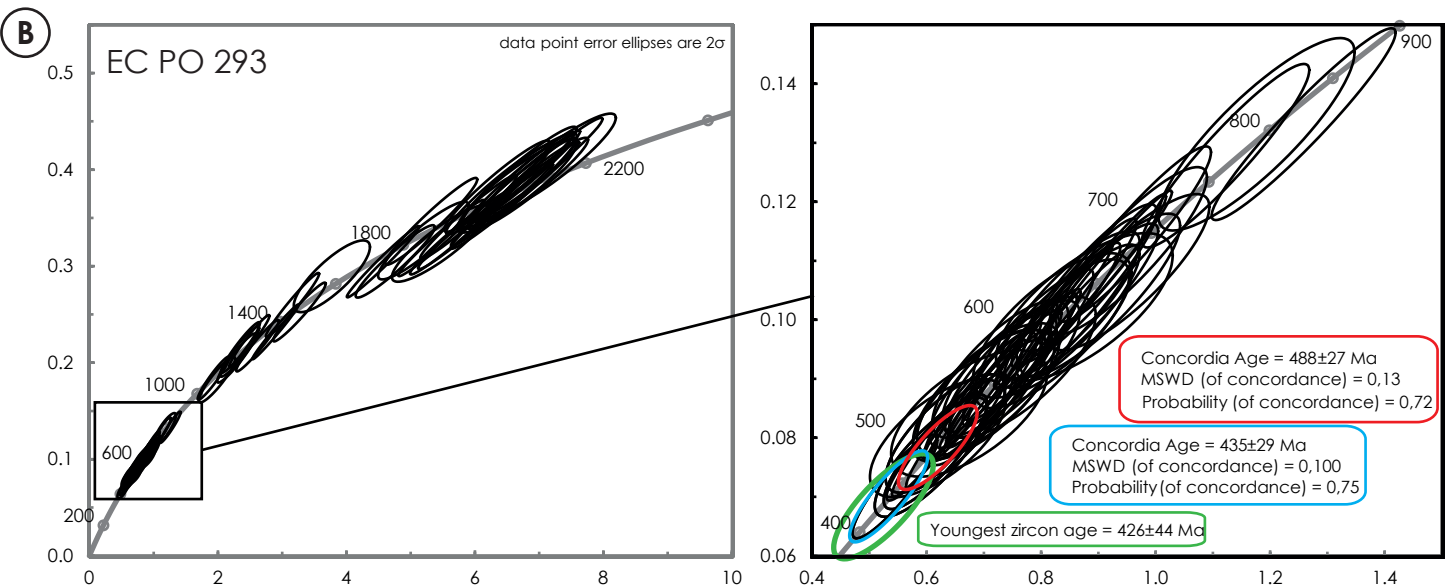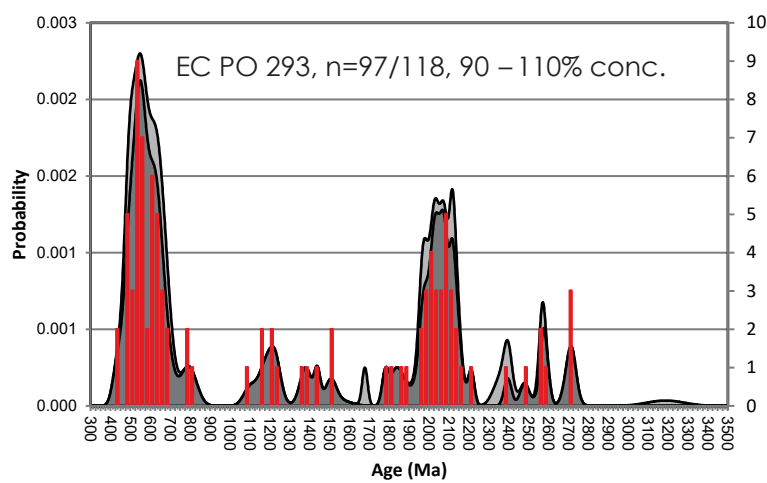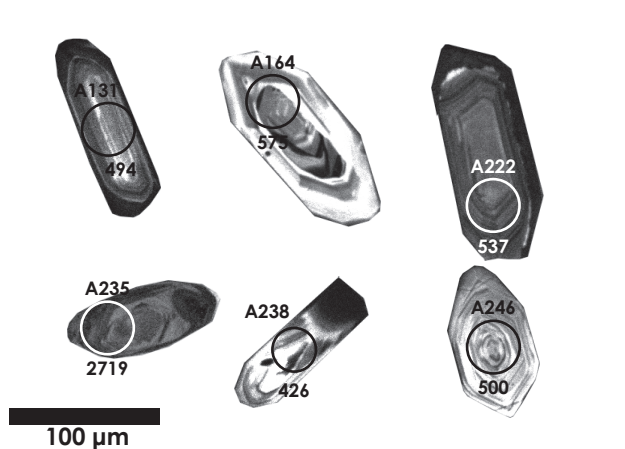

Supplement: Supplementary file 5 [file se-2020-173-supplement.zip]

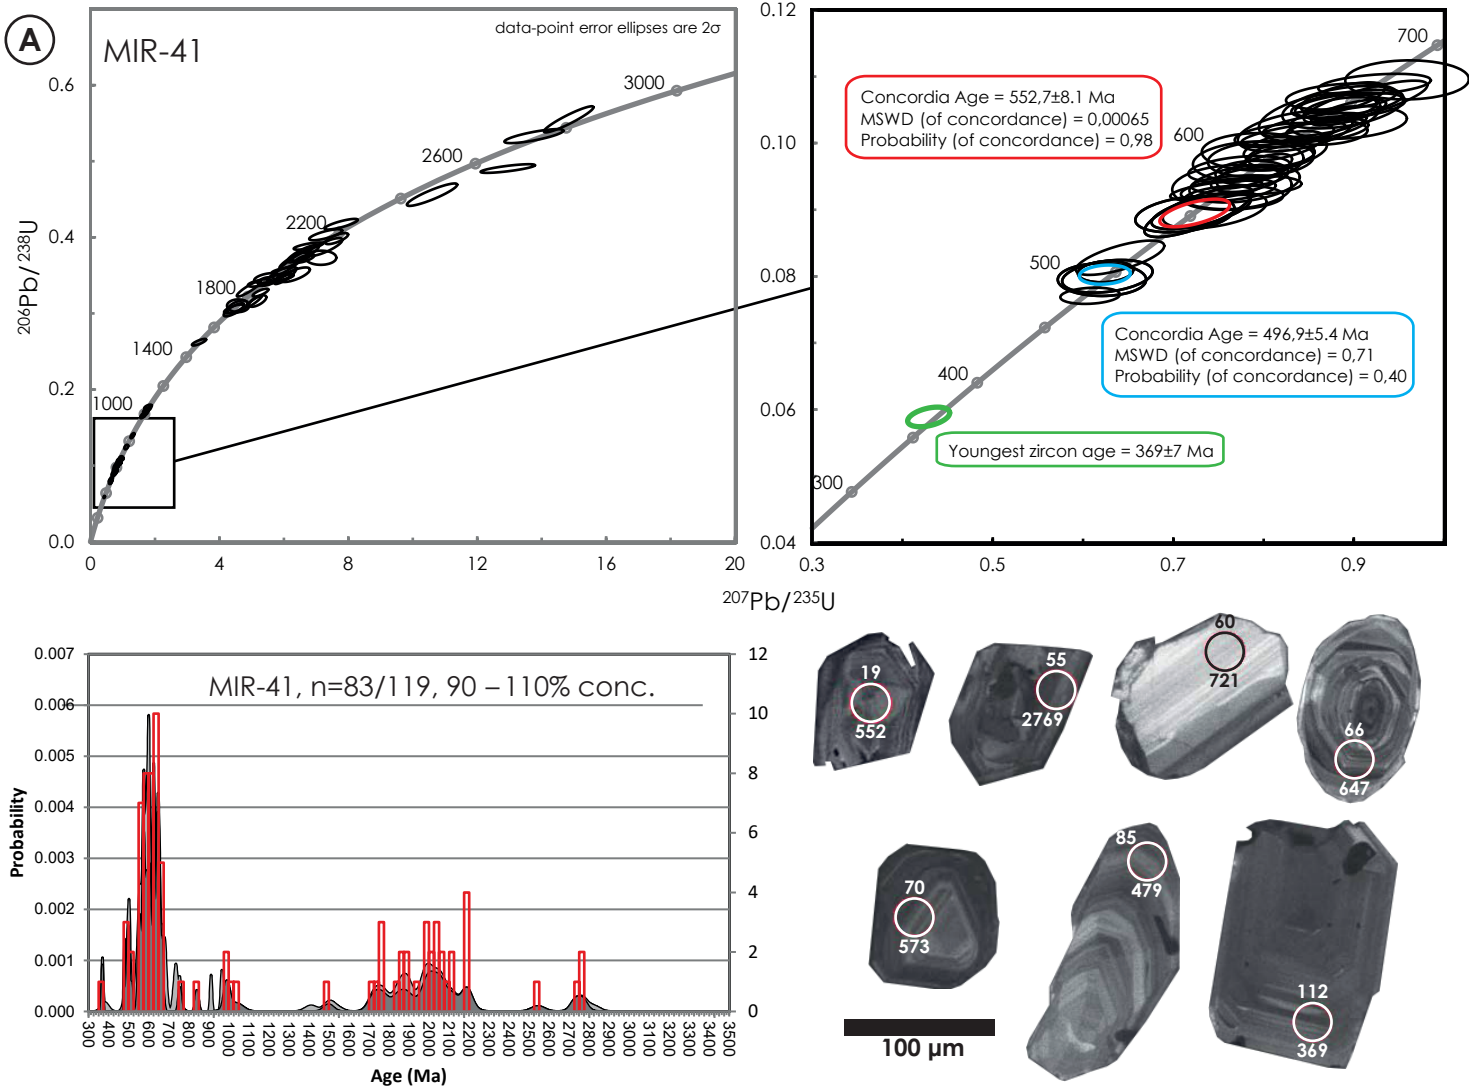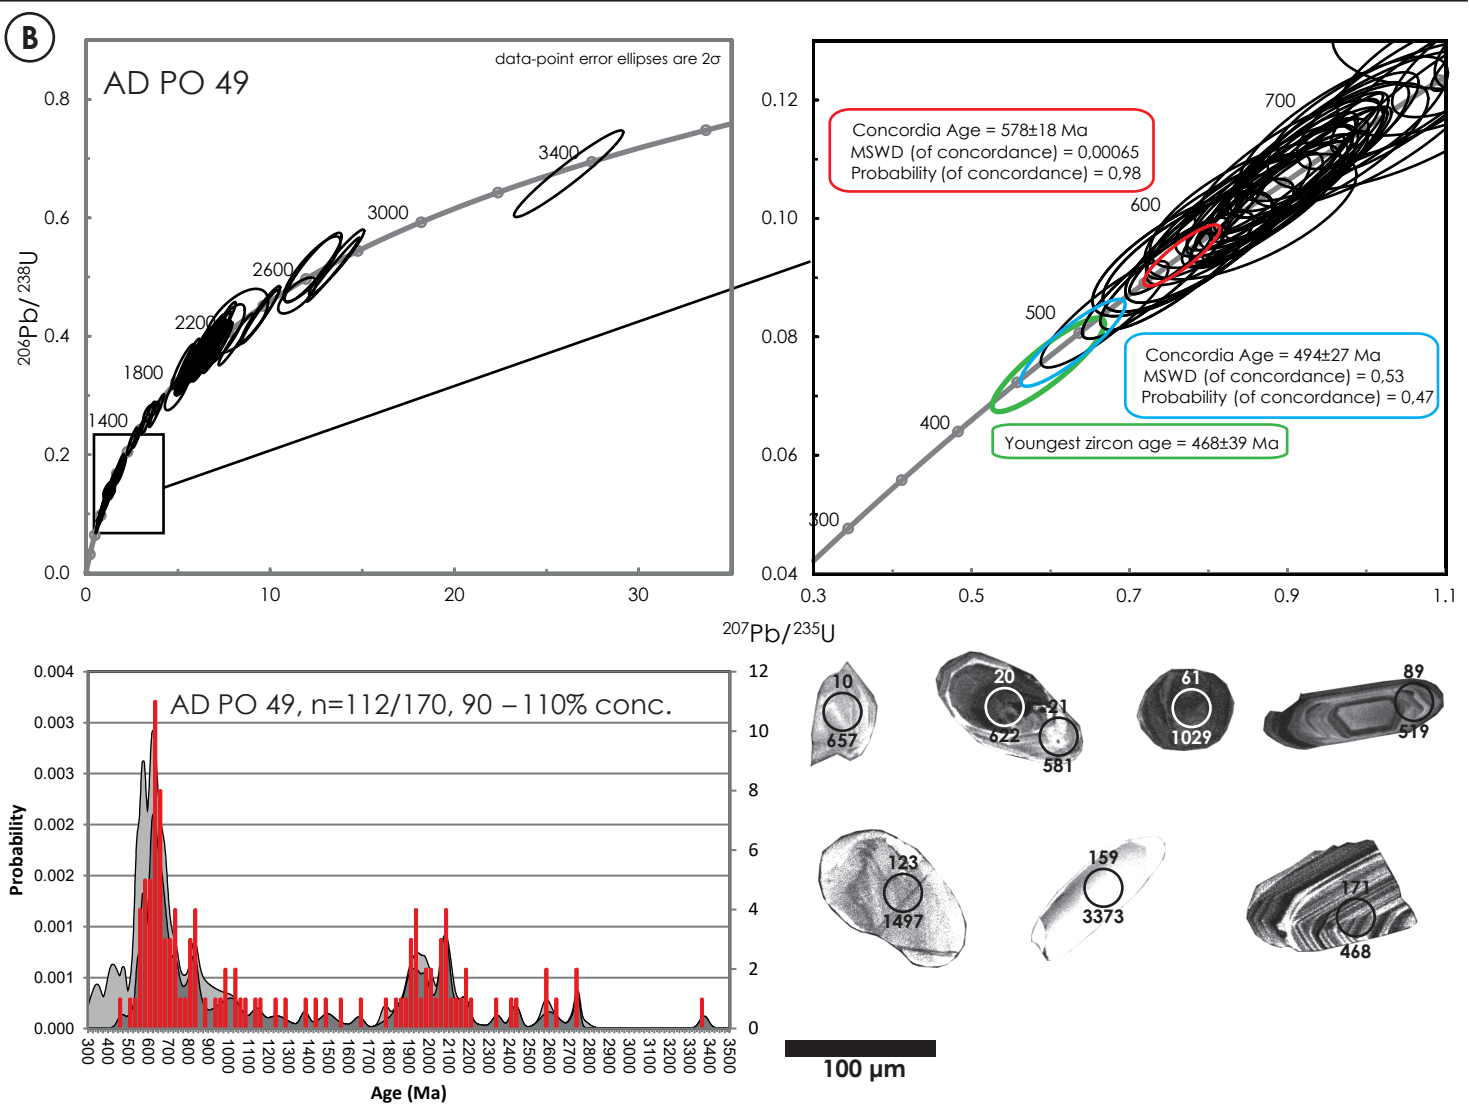

Supplement: Supplementary file 6 [file se-2020-173-supplement.zip]

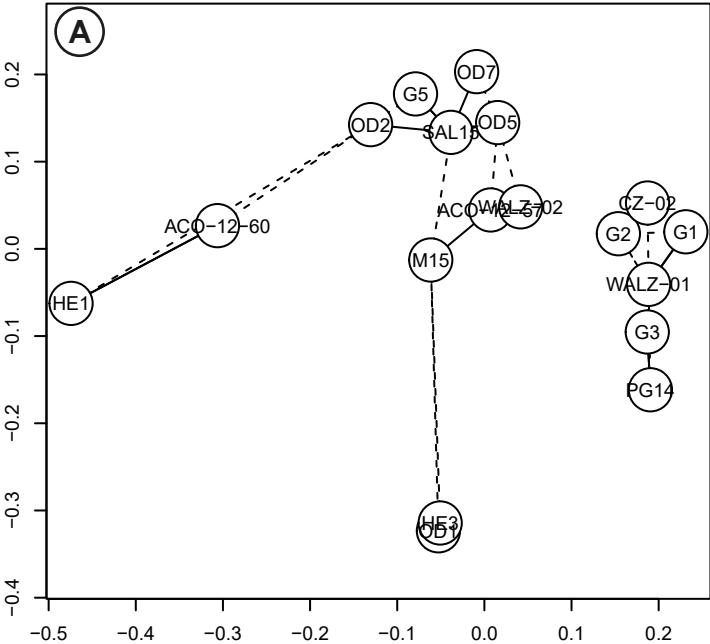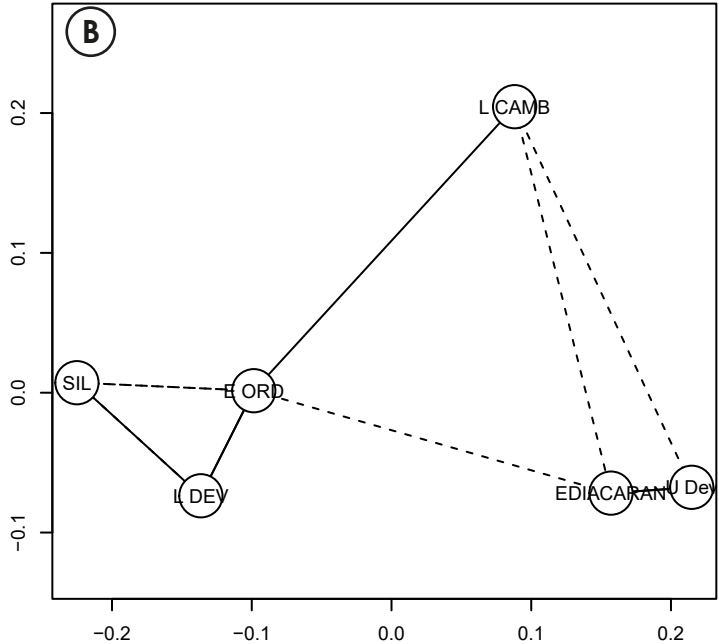

Supplement: Supplementary file 7 [file se-2020-173-supplement.zip]

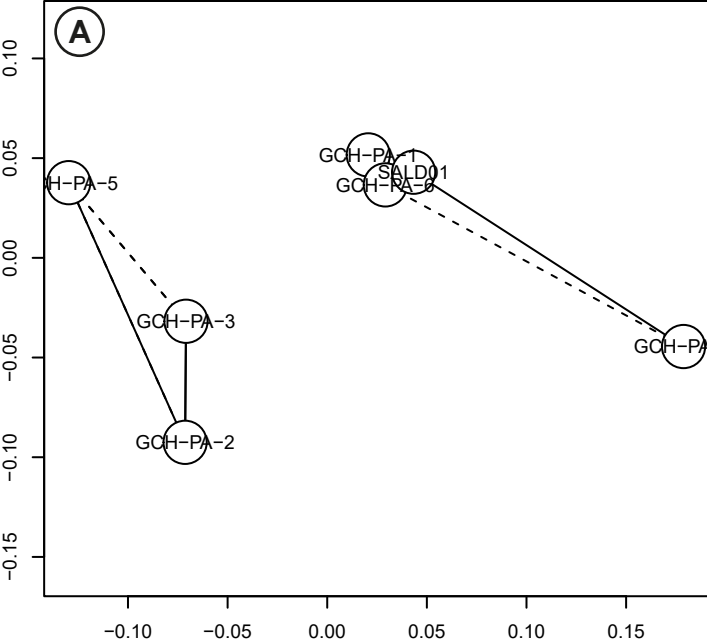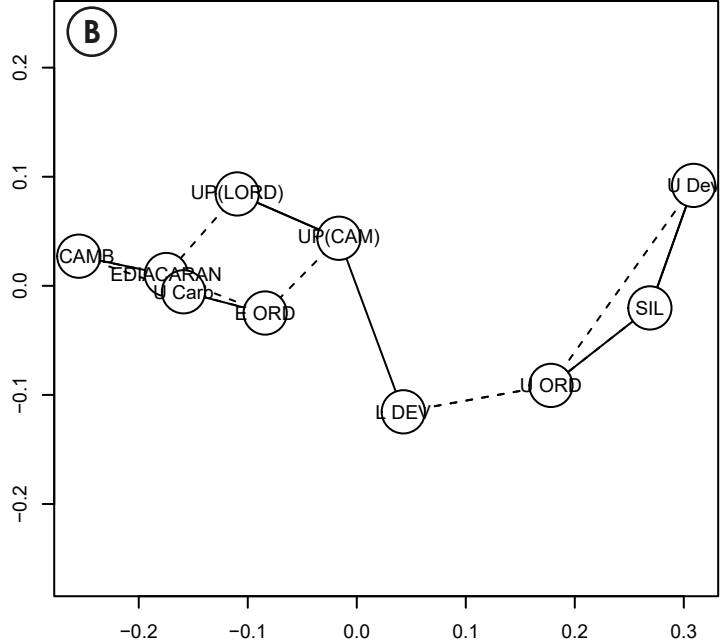

Supplement: Supplementary file 8 [file se-2020-173-supplement.zip]

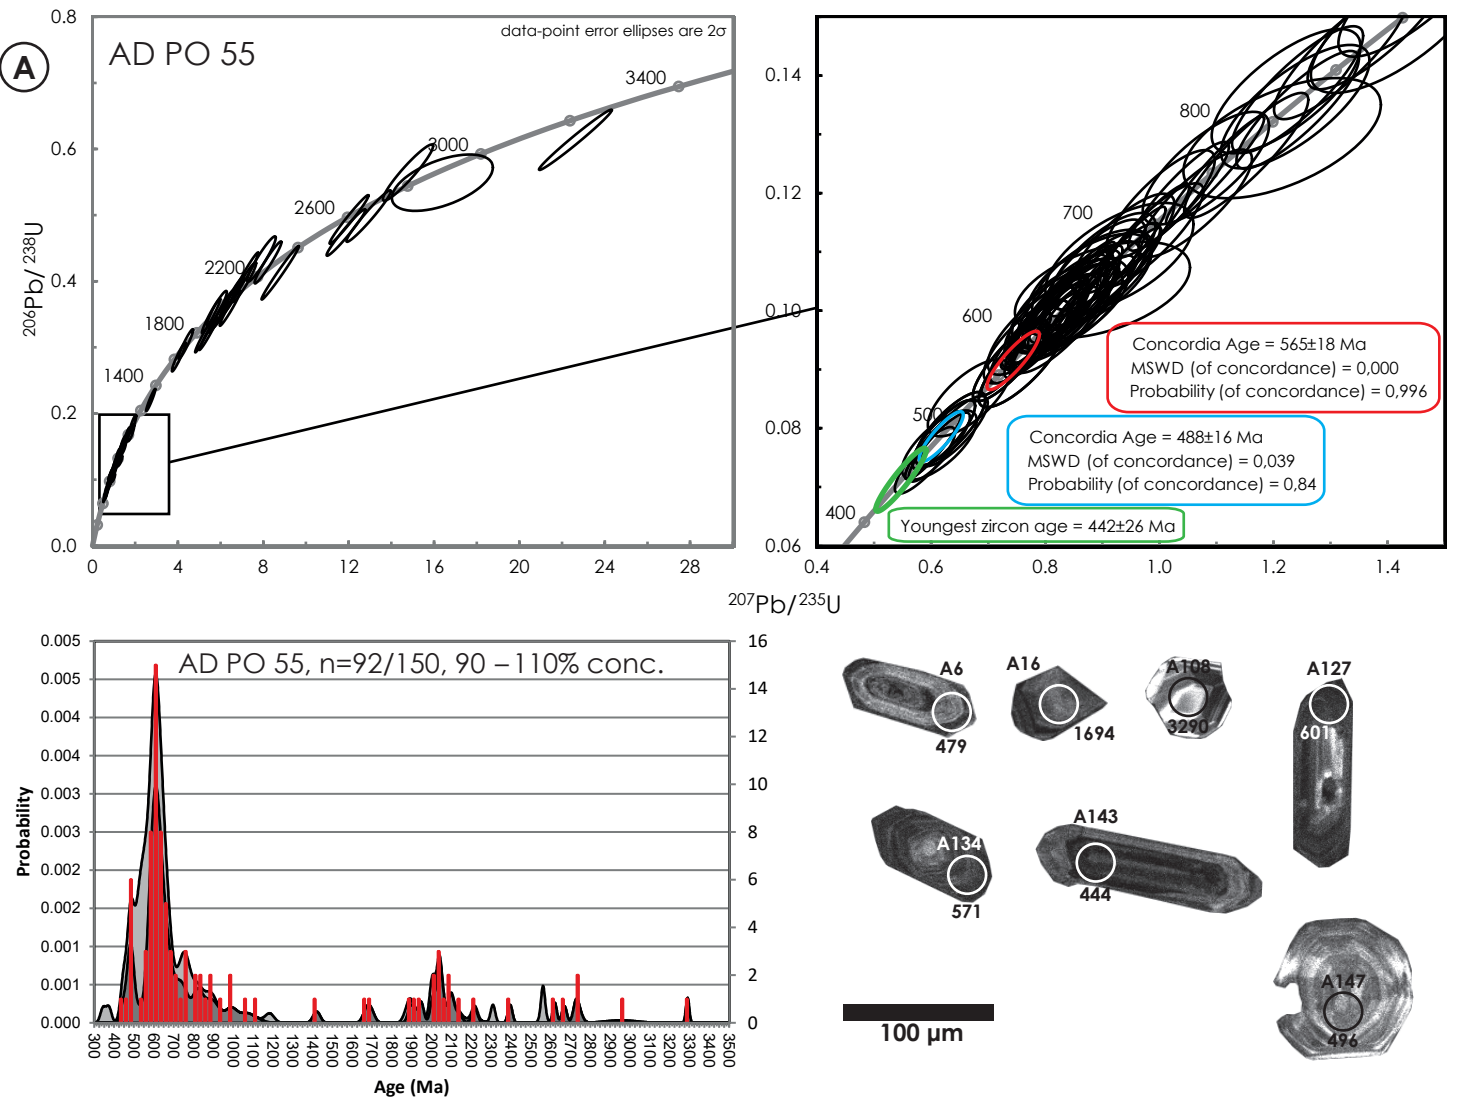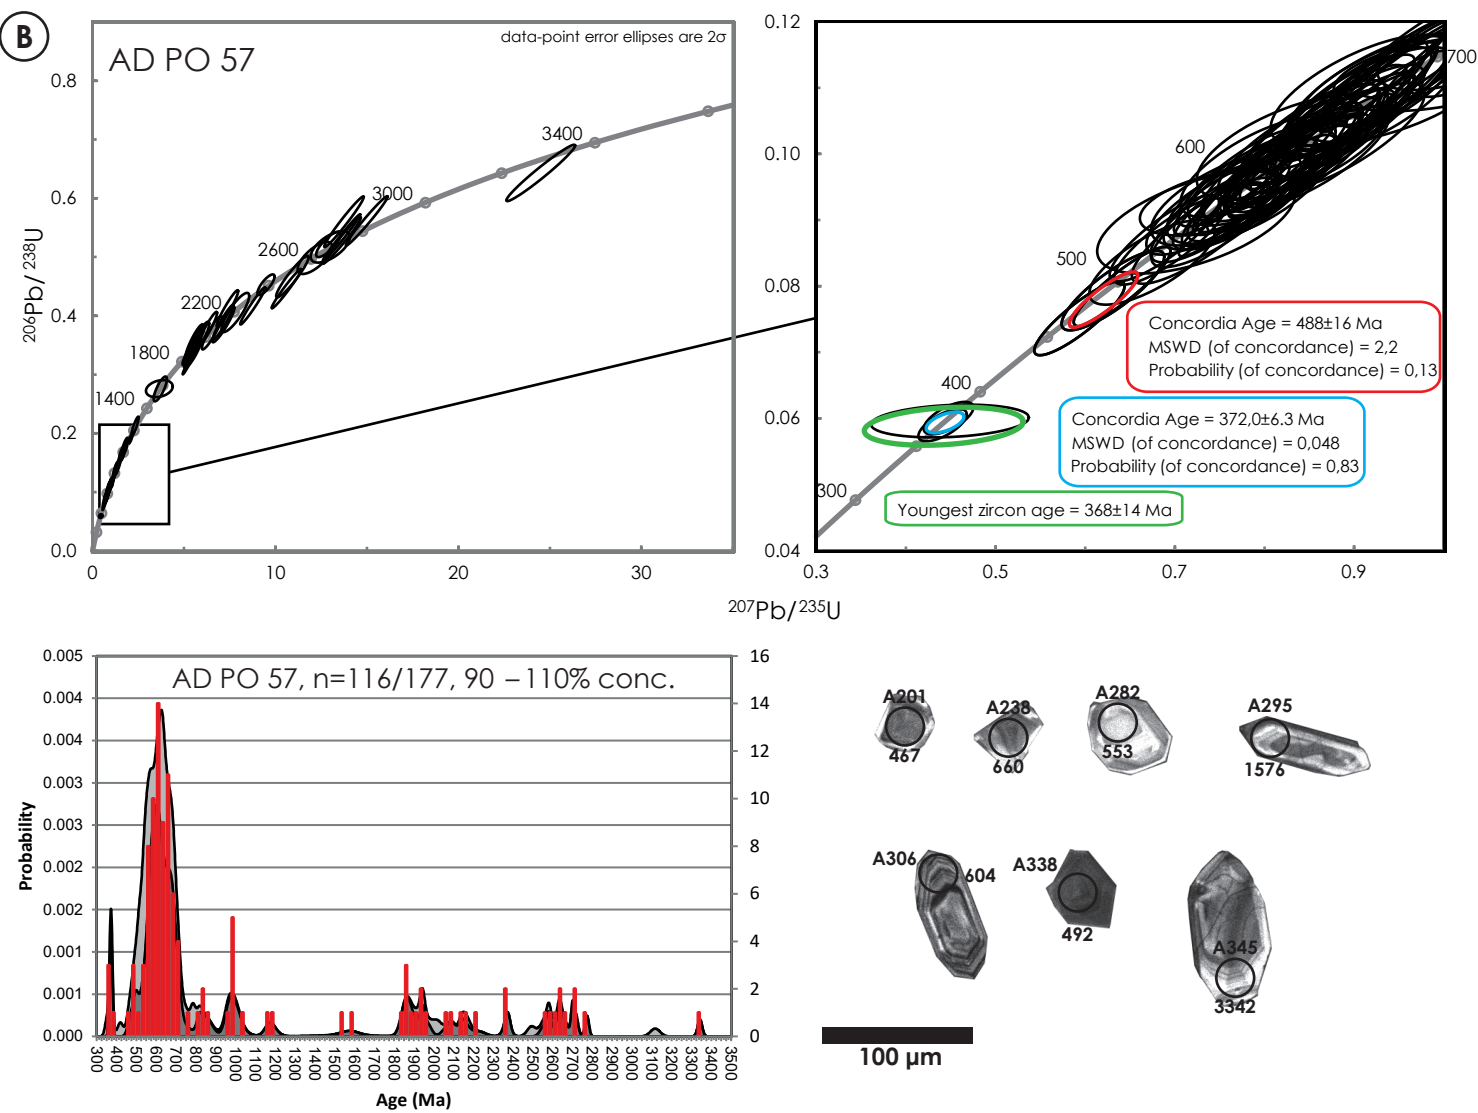

Supplement: Supplementary file 10 [file se-2020-173-supplement.zip]

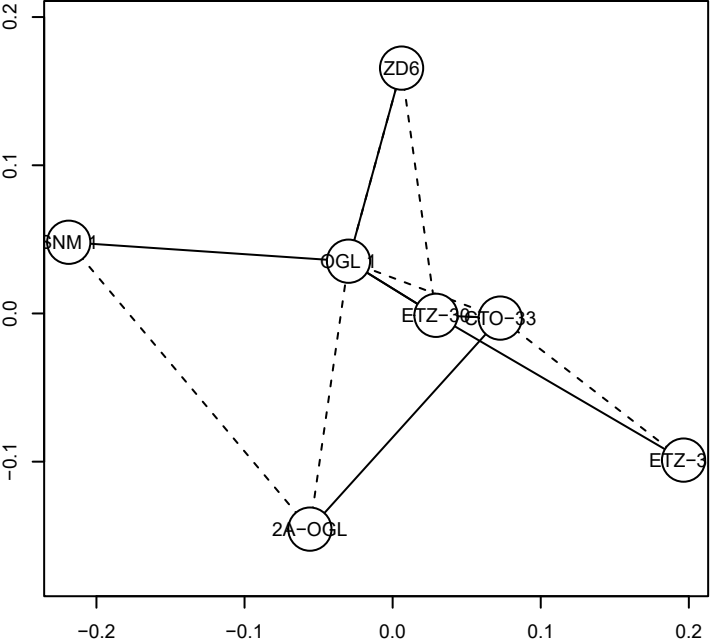

Supplement: Supplementary file 11 [file se-2020-173-supplement.zip]

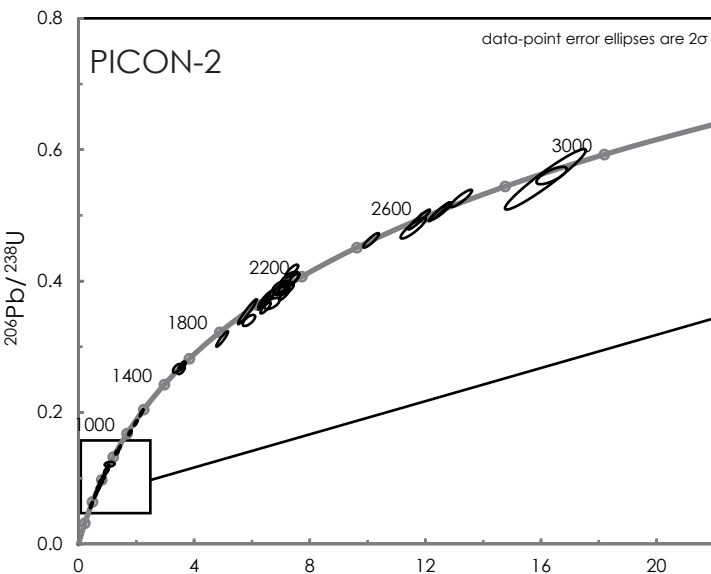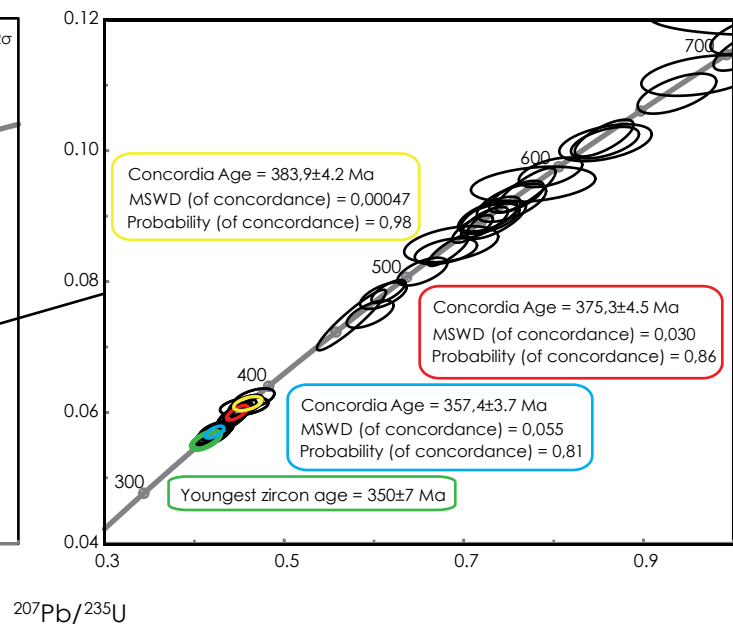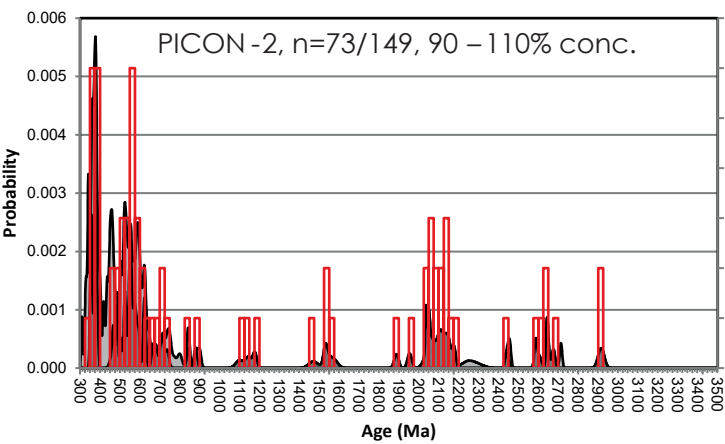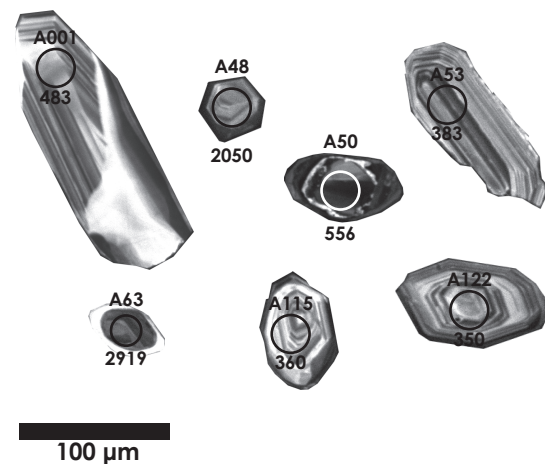

Supplement: Supplementary file 12 [file se-2020-173-supplement.zip]

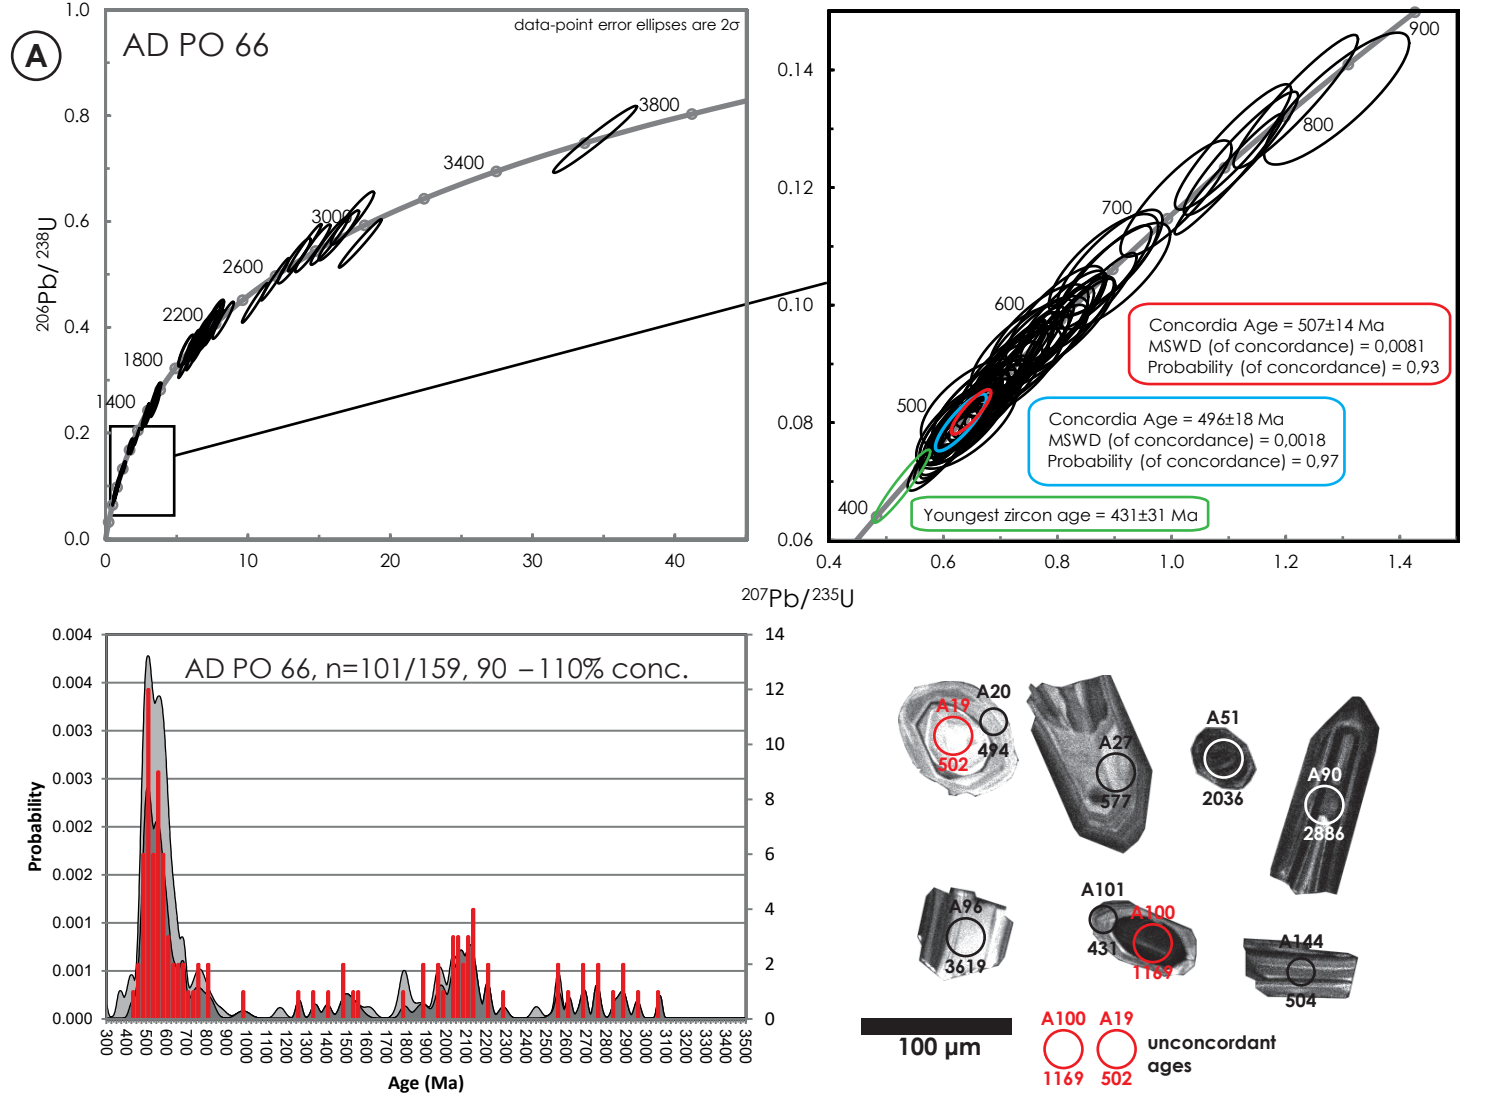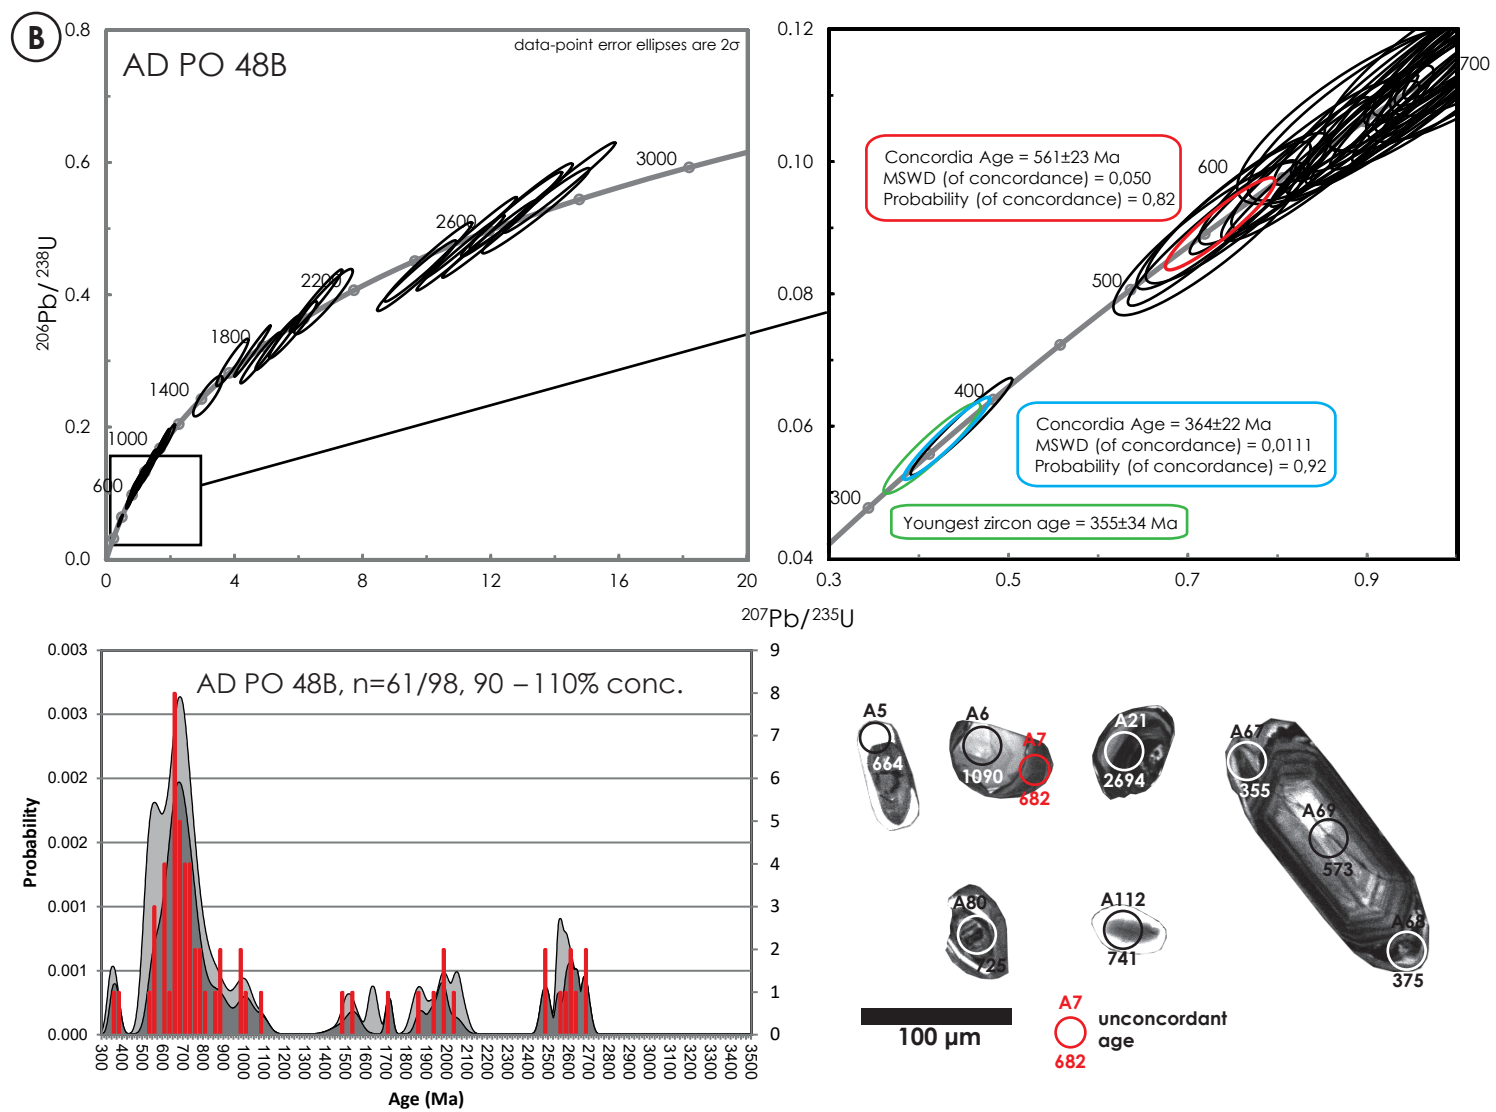

Supplement: Supplementary file 13 [file se-2020-173-supplement.zip]

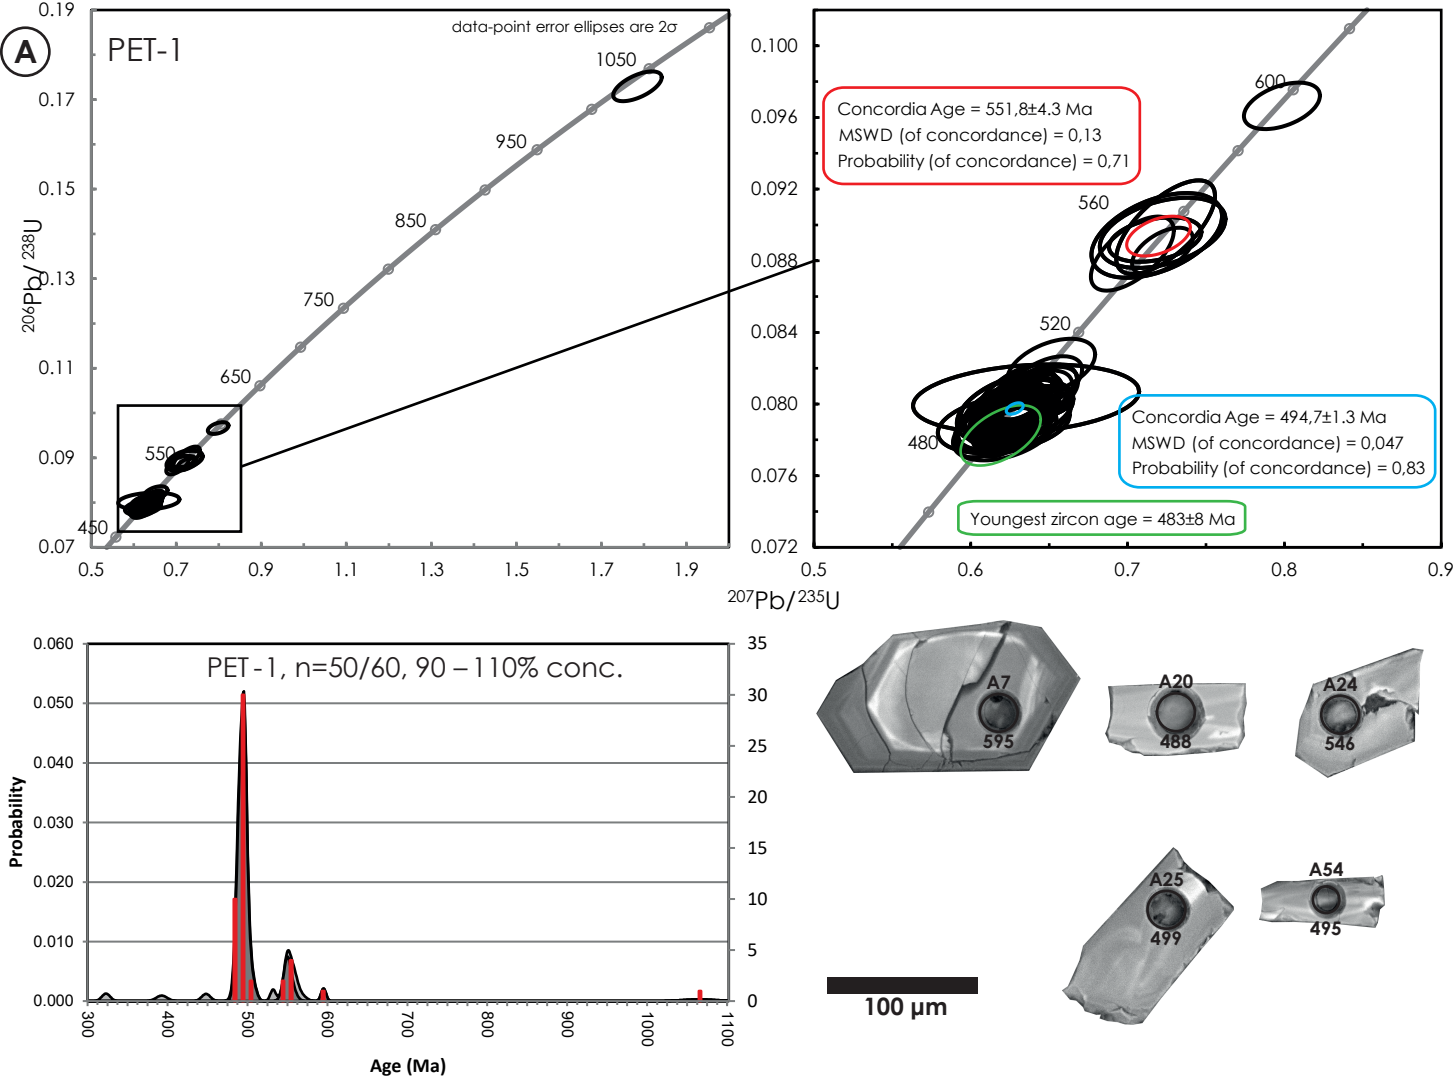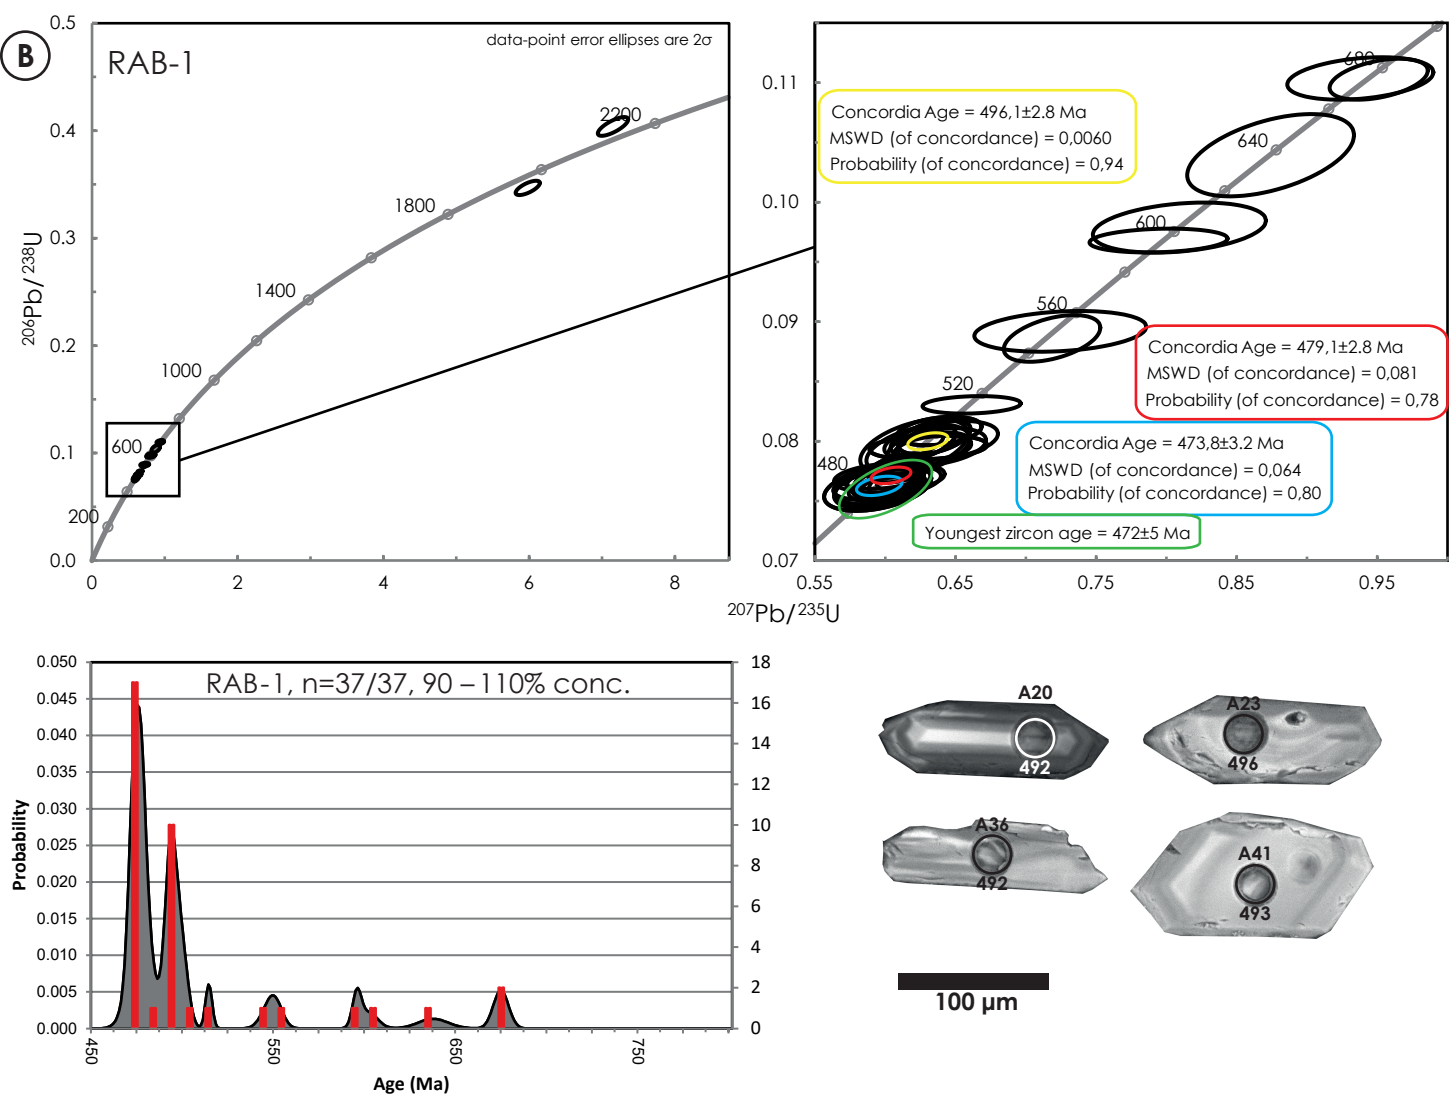

Supplement: Supplementary file 14 [file se-2020-173-supplement.zip]

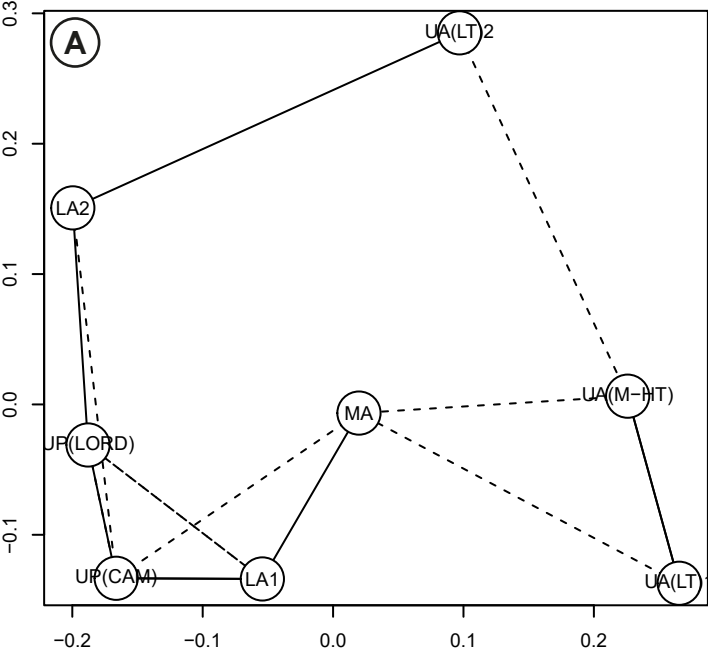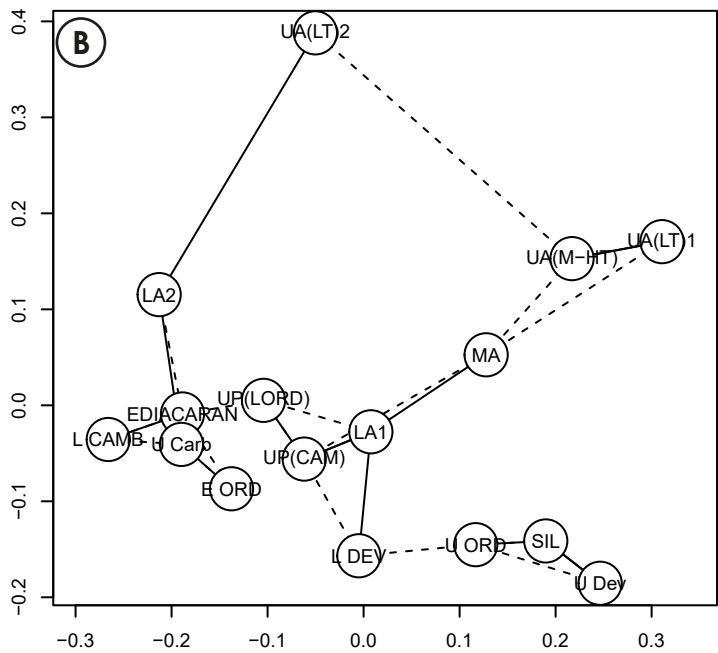

Supplement: Supplementary file 15 [file se-2020-173-supplement.zip]

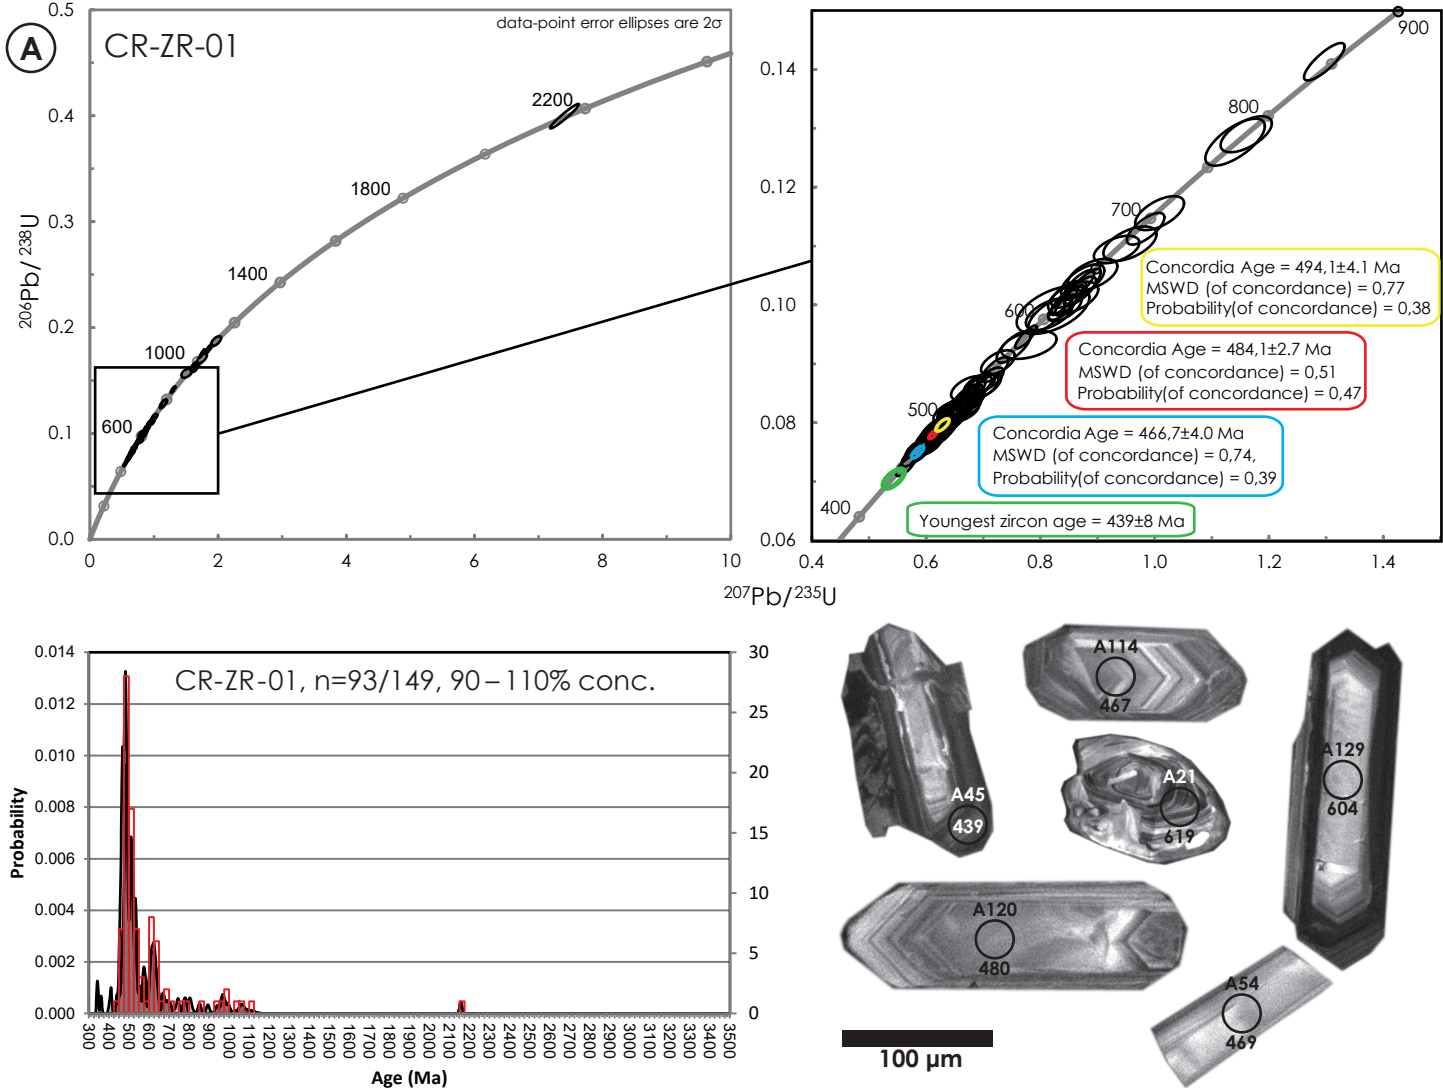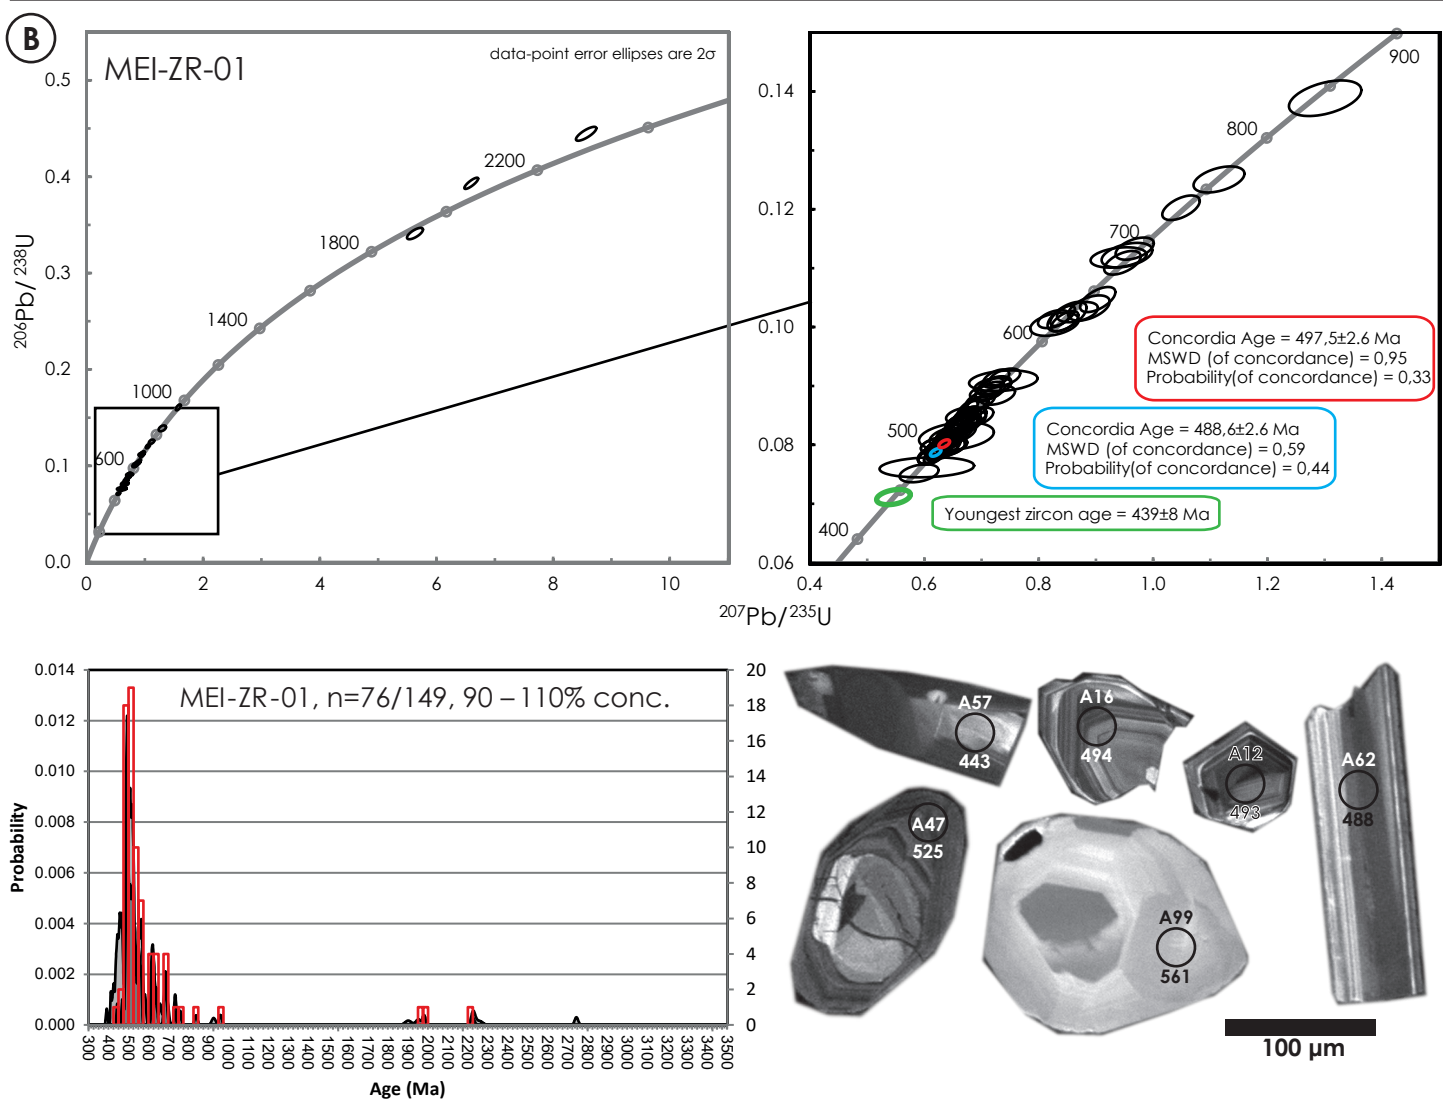

Supplement: Supplementary file 16 [file se-2020-173-supplement.zip]
